# Supplementary material for: Genome-wide analysis of the pentatricopeptide repeat gene family in different maize genomes and its important role in kernel development
Source: BMC Plant Biol. 2018 Dec 19;18:366. doi: 10.1186/s12870-018-1572-2 (PMC6299966; doi:10.1186/s12870-018-1572-2)
Supplement: Supplementary file 5 — Table S4. PPR genes from the B73 genome with multiple copies in the PH207 genome. (XLSX 84 kb) [file 12870_2018_1572_MOESM5_ESM.xlsx]

## Sheet: Sheet1
Table S5 The genes have multiple copies in the PH207 genome
B73 Gene ID	PH207 Gene ID	Identity (%)	Coverage(%)	E-value	PH207a
GRMZM2G130314	Zm00008a018989	98.77	79.76	2e-177	yes
	Zm00008a011982	68.53	68.34	2e-93	yes
GRMZM2G144071	Zm00008a019102	100	99.84	0	yes
	Zm00008a013530	47	98.72	2e-149	yes
	Zm00008a019224	47.76	92.53	4e-147	yes
	Zm00008a038119	44.76	89.06	1e-145	yes
	Zm00008a030174	43.82	81.77	2e-142	yes
GRMZM2G099604	Zm00008a019224	98.96	90.58	0	yes
	Zm00008a038119	44.78	87.19	8e-162	yes
	Zm00008a019102	47.5	97.74	5e-156	yes
	Zm00008a013530	43.75	96.65	6e-151	yes
	Zm00008a028383	42.99	95.58	3e-145	yes
GRMZM2G090576	Zm00008a019854	99.6	77.36	0	yes
	Zm00008a004460	89.36	77.21	0	yes
	Zm00008a033104	48.12	80.78	0	yes
	Zm00008a022063	44.42	99.23	1e-158	yes
	Zm00008a007262	42.69	69.15	4e-128	yes
GRMZM2G477688	Zm00008a004138	86.43	67.27	1e-73	yes
	Zm00008a023385	44.78	69.16	5e-27	yes
GRMZM2G094999	Zm00008a038119	40.37	93.24	4e-147	yes
	Zm00008a030174	41.11	85.6	3e-142	yes
GRMZM2G095094	Zm00008a039836	92.6	64.26	0	no
	Zm00008a017213	96.25	60.24	6e-103	no
GRMZM2G177894	Zm00008a020433	100	92.02	0	yes
	Zm00008a030174	44.04	87.71	3e-139	yes
	Zm00008a009830	42.25	86.75	3e-130	yes
	Zm00008a038119	42.26	95.54	4e-129	yes
	Zm00008a005366	41.44	84.05	2e-125	yes
GRMZM2G347605	Zm00008a020529	98.01	81	0	yes
	Zm00008a030174	44.66	98.02	3e-158	yes
GRMZM2G059877	Zm00008a020791	98.64	60.56	1e-156	yes
	Zm00008a039799	96.28	90.52	2e-149	no
	Zm00008a020799	95.54	74.92	9e-71	yes
	Zm00008a040385	96.97	98.79	2e-36	no
GRMZM2G064951	Zm00008a020791	95.51	83.89	0	yes
	Zm00008a039799	96.83	65.34	8e-155	no
GRMZM2G049755	Zm00008a020843	100	93.62	0	yes
	Zm00008a027746	40.51	87.62	3e-157	yes
GRMZM2G039016	Zm00008a007262	95.2	84.08	0	yes
	Zm00008a004460	46.47	75.3	6e-121	yes
	Zm00008a019854	45.65	75.15	2e-118	yes
	Zm00008a033104	46.56	71.98	2e-114	yes
GRMZM2G038882	Zm00008a021760	100	99.4	0	yes
	Zm00008a033104	42.14	77.65	2e-35	yes
GRMZM2G114241	Zm00008a022004	99.68	79.42	0	yes
	Zm00008a028355	45.88	93.6	6e-129	yes
	Zm00008a038119	44.42	89.93	5e-124	yes
	Zm00008a009830	44.7	92.16	1e-123	yes
	Zm00008a030174	43.67	82.56	2e-123	yes
GRMZM2G421231	Zm00008a022063	98.78	79.46	0	yes
	Zm00008a033104	47.98	63.69	0	yes
	Zm00008a004460	45.33	60.88	4e-170	yes
	Zm00008a019854	44.3	61	5e-164	yes
GRMZM2G127963	Zm00008a022078	99.25	76.19	0	yes
	Zm00008a033104	41.98	91.89	5e-143	yes
	Zm00008a022063	42.48	87.23	1e-140	yes
	Zm00008a004460	43	87.83	2e-138	yes
	Zm00008a007262	46.53	78.66	2e-137	yes
GRMZM2G332843	Zm00008a022348	99.36	88.7	0	yes
	Zm00008a030174	40.28	62.22	6e-99	yes
GRMZM2G045154	Zm00008a022709	100	99.84	0	yes
	Zm00008a017016	89.28	98.72	0	yes
GRMZM2G012213	Zm00008a022861	98.88	88.52	0	yes
	Zm00008a027746	43.49	81.23	2e-174	yes
	Zm00008a005366	40.13	77.22	7e-148	yes
	Zm00008a033538	42.78	91.97	6e-146	yes
GRMZM2G341479	Zm00008a022886	99.18	74.8	0	yes
	Zm00008a022348	41.44	91.9	3e-100	yes
	Zm00008a028355	40.3	83.42	2e-95	yes
	Zm00008a017522	41.84	87.91	2e-95	yes
AC208348.3_FG012	Zm00008a023387	98.53	83.4	0	yes
	Zm00008a030390	42.4	80.12	9e-98	yes
	Zm00008a030174	43.9	69.22	3e-93	yes
	Zm00008a009830	40.73	90.97	3e-91	yes
	Zm00008a006820	40.95	95.97	3e-88	yes
GRMZM2G444222	Zm00008a014912	100	64.15	0	yes
	Zm00008a017522	44.98	83.14	8e-90	yes
	Zm00008a029875	45.6	71.32	8e-87	yes
	Zm00008a030390	44.76	78.9	2e-80	yes
	Zm00008a006820	41.88	94.51	8e-80	yes
GRMZM2G095924	Zm00008a016119	97.7	94.71	0	yes
	Zm00008a015066	83.86	83.86	0	yes
GRMZM2G459532	Zm00008a015309	99.32	91.84	0	yes
	Zm00008a029875	44.1	76.99	3e-88	yes
	Zm00008a003427	44.16	79.27	1e-82	yes
	Zm00008a010516	43.15	75.04	2e-82	yes
GRMZM2G013519	Zm00008a006857	95.65	60.52	2e-141	no
	Zm00008a011442	93.24	60.09	2e-137	no
GRMZM2G125151	Zm00008a025043	58.68	98.14	5e-54	no
	Zm00008a024405	59.06	84.69	1e-53	no
	Zm00008a014459	52.17	96.48	3e-51	no
	Zm00008a014411	49.2	67.93	1e-48	no
GRMZM2G426888	Zm00008a016023	97.95	90.51	3e-172	yes
	Zm00008a038119	40.68	75.83	1e-92	yes
	Zm00008a006820	46.95	96.52	2e-91	yes
	Zm00008a030390	44.51	80.58	3e-83	yes
	Zm00008a019224	46.75	78.77	1e-81	yes
GRMZM2G146518	Zm00008a016119	98	94.71	0	yes
	Zm00008a015066	84.48	83.86	0	yes
GRMZM2G156472	Zm00008a017016	99.59	79.42	0	yes
	Zm00008a022709	90.41	78.27	0	yes
	Zm00008a013530	40.94	78.15	3e-107	yes
	Zm00008a019224	40.45	73.24	4e-106	yes
GRMZM2G385352	Zm00008a039836	83.03	89.32	0	no
	Zm00008a017213	98.78	95.28	2e-114	no
	Zm00008a030247	94.74	65.77	7e-86	yes
GRMZM2G493155	Zm00008a007840	54.07	71.62	5e-68	yes
	Zm00008a013891	56.85	90.69	4e-55	yes
	Zm00008a011705	76.32	68.51	1e-30	no
GRMZM2G029859	Zm00008a017261	100	61.3	0	yes
	Zm00008a025089	74.6	62.32	2e-180	no
GRMZM2G158839	Zm00008a017522	99.75	86.49	0	yes
	Zm00008a029875	45.16	74.19	7e-112	yes
	Zm00008a030174	40.27	65.52	3e-108	yes
	Zm00008a009830	41.23	86.11	3e-102	yes
	Zm00008a003427	43.18	82.26	4e-102	yes
GRMZM2G132956	Zm00008a017811	95.7	100	0	yes
	Zm00008a014809	74.06	98.89	0	yes
	Zm00008a010597	75.27	95.56	0	yes
GRMZM2G320723	Zm00008a038119	40.48	85.18	9e-98	yes
	Zm00008a013530	44.41	94.42	1e-92	yes
	Zm00008a030174	42.9	78.2	3e-88	yes
GRMZM2G140600	Zm00008a017981	98.1	93.12	0	yes
	Zm00008a033789	43.19	91.3	3e-145	yes
	Zm00008a027746	41.07	75.5	4e-134	yes
GRMZM2G087226	Zm00008a018713	99.78	95.17	0	yes
	Zm00008a038119	42.7	68.06	3e-83	yes
GRMZM2G106280	Zm00008a039836	91.19	89.69	0	no
	Zm00008a013846	95.16	66.94	5e-127	yes
	Zm00008a008864	77.27	68.17	3e-87	yes
GRMZM2G436214	Zm00008a005948	98.48	89.75	0	yes
	Zm00008a003250	40.35	88.71	4e-92	yes
AC212835.3_FG001	Zm00008a006635	100	82.33	0	yes
	Zm00008a009999	40.14	88.55	3e-98	yes
GRMZM2G474929	Zm00008a006820	100	99.82	0	yes
	Zm00008a020433	44.62	89.2	2e-110	yes
GRMZM2G331779	Zm00008a006900	97.79	81.19	0	yes
	Zm00008a001684	41.93	94.71	2e-160	yes
	Zm00008a028383	40.11	98.6	7e-158	yes
	Zm00008a025568	40.35	96.55	8e-157	yes
	Zm00008a003250	44.29	94.28	2e-152	yes
GRMZM2G105542	Zm00008a007262	100	74.58	0	yes
	Zm00008a022063	46.43	92	1e-163	yes
	Zm00008a033104	41.2	87.12	5e-139	yes
	Zm00008a004460	41.53	83.28	3e-134	yes
	Zm00008a019854	41.25	83.44	6e-130	yes
GRMZM2G369792	Zm00008a007431	81.69	94.21	0	yes
	Zm00008a012964	42.31	86.5	5e-105	yes
GRMZM2G365570	Zm00008a007840	89.85	60.15	0	yes
	Zm00008a013891	82.99	76.16	0	yes
GRMZM2G138303	Zm00008a008466	95.34	76.65	0	yes
	Zm00008a038119	43.94	96.12	7e-158	yes
	Zm00008a033538	41.75	83.98	4e-157	yes
	Zm00008a001684	42.98	91.17	3e-156	yes
	Zm00008a027746	43.45	88.95	2e-150	yes
GRMZM2G466578	Zm00008a008603	100	78.76	0	yes
	Zm00008a027269	93.36	63.15	0	yes
	Zm00008a023480	47.12	98.41	7e-151	yes
GRMZM2G317728	Zm00008a008858	99.8	99.8	0	yes
	Zm00008a016666	96.3	92.13	1e-147	yes
	Zm00008a020472	97.76	67.07	2e-79	no
GRMZM2G117988	Zm00008a009574	98.23	78.59	9e-169	yes
	Zm00008a027571	93.1	84.83	5e-121	no
	Zm00008a003142	57.49	80.92	2e-53	yes
GRMZM5G873123	Zm00008a029279	82.47	84.97	0	yes
	Zm00008a009711	80.82	61.18	2e-139	yes
GRMZM2G703373	Zm00008a009830	100	99.83	0	yes
	Zm00008a038119	43.42	82.73	7e-157	yes
	Zm00008a027746	44.31	76.56	2e-147	yes
	Zm00008a028355	47.65	98.29	9e-147	yes
	Zm00008a030174	45.65	75.96	4e-146	yes
GRMZM2G474451	Zm00008a009920	100	92.28	0	yes
	Zm00008a009922	97.99	92.28	0	yes
GRMZM2G168326	Zm00008a009922	99.61	63.2	1e-142	yes
	Zm00008a009920	98.43	63.2	4e-140	yes
GRMZM2G172800	Zm00008a009920	86.67	69.52	0	yes
	Zm00008a009922	85.48	69.52	0	yes
GRMZM2G422171	Zm00008a009922	96.18	96.84	0	yes
	Zm00008a009920	94.58	96.84	0	yes
GRMZM2G151975	Zm00008a009999	99.05	90.81	0	yes
	Zm00008a006635	41.16	80.28	1e-93	yes
GRMZM2G053384	Zm00008a010230	97.96	82.76	0	yes
	Zm00008a007546	96.48	61.64	0	yes
	Zm00008a016602	40.38	77.51	4e-140	yes
GRMZM2G416498	Zm00008a040458	99.87	98.91	0	no
	Zm00008a010246	99.49	98.55	0	yes
	Zm00008a040352	96.3	98.55	0	no
	Zm00008a010238	96.05	98.55	0	yes
	Zm00008a010240	90.69	94.07	0	yes
GRMZM2G124602	Zm00008a040352	95.66	99.88	0	no
	Zm00008a040458	94.52	99.76	0	no
	Zm00008a010246	94.39	99.88	0	yes
	Zm00008a010238	94.39	99.88	0	yes
	Zm00008a010240	89.41	95.34	0	yes
GRMZM2G144843	Zm00008a009830	44.42	95.14	5e-121	yes
	Zm00008a010516	46.37	86.03	4e-119	yes
	Zm00008a038119	43.43	78.85	3e-118	yes
	Zm00008a030174	43.95	72.39	9e-117	yes
AC206764.4_FG001	Zm00008a010597	100	99.85	0	yes
	Zm00008a014809	95.65	96.49	0	yes
	Zm00008a017811	75.74	95.42	0	yes
GRMZM2G380195	Zm00008a011116	97.93	83.25	0	yes
	Zm00008a001684	42.36	73.37	3e-139	yes
	Zm00008a038119	40.35	83.73	1e-132	yes
	Zm00008a033538	45.63	67.59	2e-131	yes
GRMZM2G411786	Zm00008a022964	40.89	95.85	2e-113	yes
	Zm00008a016602	41.19	97.77	1e-110	yes
GRMZM2G130366	Zm00008a011597	99.84	99.84	0	yes
	Zm00008a029805	80.55	98.39	0	yes
	Zm00008a027103	40.72	87.93	4e-40	yes
GRMZM2G435756	Zm00008a011982	90.88	83.17	0	yes
	Zm00008a018989	48.68	97.07	4e-45	yes
GRMZM2G477894	Zm00008a012170	80.13	88.06	8e-162	yes
	Zm00008a033892	79.8	88.06	6e-161	yes
	Zm00008a029373	72.2	60.48	1e-94	yes
GRMZM2G162988	Zm00008a012242	99.56	99.86	0	yes
	Zm00008a027746	40.57	93.21	5e-167	yes
GRMZM2G328427	Zm00008a012477	99.42	99.81	0	yes
	Zm00008a009830	41.1	92.71	3e-113	yes
GRMZM2G060536	Zm00008a012680	96.93	99.23	0	yes
	Zm00008a018304	44.69	97	0	yes
GRMZM2G115152	Zm00008a012956	76.74	98.47	0	yes
	Zm00008a003427	40.6	97.84	2e-122	yes
AC214534.3_FG010	Zm00008a012964	99.01	99.26	0	yes
	Zm00008a020433	43.11	87.4	3e-94	yes
	Zm00008a017522	40.16	80.34	6e-92	yes
	Zm00008a030174	42.01	70.54	3e-90	yes
	Zm00008a012477	41.03	99.81	2e-89	yes
AC196637.2_FG002	Zm00008a013116	99.74	73.65	0	yes
	Zm00008a035743	46.06	99.62	9e-124	yes
	Zm00008a038119	46.65	74.82	7e-123	yes
	Zm00008a028383	42.69	82.02	5e-118	yes
GRMZM2G399433	Zm00008a013489	99.38	60.7	0	yes
	Zm00008a017261	41.16	73.96	6e-116	yes
GRMZM2G456114	Zm00008a013530	99.83	96.76	0	yes
	Zm00008a038119	45.79	93.24	2e-156	yes
	Zm00008a019102	46.71	95.68	4e-152	yes
	Zm00008a019224	44.17	96.86	1e-147	yes
	Zm00008a009830	49.31	88.89	1e-147	yes
GRMZM2G317285	Zm00008a013811	99.62	99.74	4e-153	yes
	Zm00008a008858	69.81	77.89	9e-39	yes
	Zm00008a015413	81.82	62.76	3e-35	yes
	Zm00008a016666	86.49	71.91	2e-34	yes
GRMZM2G074599	Zm00008a014564	98.98	65.17	0	yes
	Zm00008a026215	57.93	69.82	6e-124	yes
GRMZM2G071986	Zm00008a033346	100	69.84	0	yes
	Zm00008a038119	44.47	90.65	1e-131	yes
	Zm00008a009830	43.34	91.43	3e-131	yes
	Zm00008a013530	43.61	99.52	5e-125	yes
	Zm00008a030174	42.89	83.22	2e-124	yes
GRMZM2G160887	Zm00008a033407	100	99.82	0	yes
	Zm00008a005264	40.92	89.58	5e-132	yes
AC215198.3_FG002	Zm00008a033538	100	71.28	0	yes
	Zm00008a001684	44.42	77.38	4e-152	yes
	Zm00008a038119	42.14	88.31	2e-150	yes
	Zm00008a017261	40.63	99.24	1e-146	yes
GRMZM2G376918	Zm00008a033789	100	99.84	0	yes
	Zm00008a027746	40.87	82.56	3e-158	yes
	Zm00008a017981	42.88	85.16	2e-152	yes
	Zm00008a001326	40.48	77.11	5e-145	yes
GRMZM5G882758	Zm00008a033892	98.79	65.35	0	yes
	Zm00008a012170	96.98	65.35	0	yes
	Zm00008a025568	44.3	76.28	1e-98	yes
	Zm00008a003427	43.09	84.25	4e-95	yes
GRMZM2G144142	Zm00008a034713	99.3	99.77	0	yes
	Zm00008a022019	40.79	66.67	2e-81	yes
GRMZM2G142735	Zm00008a034792	99.64	99.82	0	yes
	Zm00008a000093	60.07	98.18	0	yes
	Zm00008a016119	40.34	82.81	1e-57	yes
GRMZM2G098869	Zm00008a035743	100	81.57	0	yes
	Zm00008a027746	44.67	84.55	3e-157	yes
	Zm00008a001684	40.8	95.91	1e-141	yes
	Zm00008a026247	40.44	71.67	4e-141	yes
	Zm00008a022964	41.23	69.32	2e-137	yes
GRMZM2G171994	Zm00008a009830	48.68	95.21	5e-146	yes
	Zm00008a038119	46.45	87.05	2e-134	yes
	Zm00008a022004	47.28	76.87	3e-132	yes
	Zm00008a030174	46.15	79.92	7e-132	yes
GRMZM2G077615	Zm00008a000093	99.44	96.59	0	yes
	Zm00008a034792	59.52	98.57	0	yes
GRMZM2G440537	Zm00008a000098	98.63	96.91	0	yes
	Zm00008a025234	44.14	98.38	7e-123	yes
	Zm00008a026711	41.05	92.56	3e-107	no
GRMZM2G046888	Zm00008a000311	99.55	80.46	0	yes
	Zm00008a038813	90.89	77.98	0	yes
GRMZM2G046919	Zm00008a000312	99.1	95.81	0	yes
	Zm00008a022004	46.35	63.66	2e-103	yes
	Zm00008a030174	40.35	66.18	1e-95	yes
GRMZM2G464818	Zm00008a000465	92.75	78.12	0	no
	Zm00008a003427	40.29	66.33	6e-79	yes
GRMZM2G398603	Zm00008a034499	83.02	82.01	1e-59	no
	Zm00008a016974	82.08	77.2	2e-58	no
GRMZM2G128665	Zm00008a000771	100	99.86	0	yes
	Zm00008a037808	75.08	73.81	4e-158	yes
	Zm00008a026588	63.73	80.03	6e-151	yes
GRMZM2G163043	Zm00008a000773	99.59	90.22	0	yes
	Zm00008a006635	43.4	83.39	4e-71	yes
AC155390.2_FG002	Zm00008a000907	100	96.69	0	yes
	Zm00008a038119	40.22	95.68	5e-160	yes
	Zm00008a033538	41.92	84.36	2e-153	yes
GRMZM2G019689	Zm00008a000938	98.57	81.23	0	yes
	Zm00008a001684	40.48	94.42	5e-137	yes
	Zm00008a038119	41.13	92.81	3e-133	yes
GRMZM2G476593	Zm00008a001326	93.62	94.48	0	yes
	Zm00008a027746	42.79	88.25	0	yes
	Zm00008a033789	40.67	72.97	5e-145	yes
GRMZM2G340279	Zm00008a001684	100	81.64	0	yes
	Zm00008a017261	40.7	95.52	6e-170	yes
	Zm00008a033538	44.42	75.2	2e-163	yes
GRMZM2G383854	Zm00008a001954	99.37	70.75	0	yes
	Zm00008a001684	41.6	89.96	5e-149	yes
	Zm00008a038119	41.87	97.41	5e-148	yes
GRMZM2G046947	Zm00008a033892	96.53	87.95	1e-85	yes
	Zm00008a029373	94.44	78.08	7e-85	yes
	Zm00008a012170	95.14	87.95	3e-83	yes
AC205500.3_FG002	Zm00008a002248	98.63	99.68	0	yes
	Zm00008a040247	79	84.89	6e-118	no
GRMZM2G333641	Zm00008a002299	98.36	98.56	0	no
	Zm00008a002291	71.08	92.24	0	no
GRMZM2G326627	Zm00008a009574	86.49	68.19	0	yes
	Zm00008a003142	70.07	66.23	2e-131	yes
	Zm00008a027571	94.25	63.18	9e-121	no
GRMZM2G056122	Zm00008a003250	98.85	93.7	0	yes
	Zm00008a028383	43.48	99.22	3e-154	yes
	Zm00008a027746	43.53	85.09	1e-143	yes
GRMZM2G161368	Zm00008a003760	99.63	91.98	0	yes
	Zm00008a038119	45.41	87.91	4e-145	yes
	Zm00008a009830	45.05	94.27	1e-141	yes
	Zm00008a019102	42.06	98.55	6e-138	yes
	Zm00008a013530	41.86	97.45	2e-134	yes
GRMZM5G803556	Zm00008a004460	99.4	71.97	0	yes
	Zm00008a019854	89.56	72.11	0	yes
	Zm00008a033104	48.59	75.29	2e-180	yes
	Zm00008a022063	45.86	93.93	1e-160	yes
	Zm00008a007262	43.15	64.45	4e-122	yes
GRMZM2G423538	Zm00008a004630	99.81	99.43	0	yes
	Zm00008a030390	43.53	79.82	4e-102	yes
GRMZM5G814549	Zm00008a004978	99.21	92.23	0	yes
	Zm00008a027746	41.52	70.31	6e-105	yes
GRMZM2G389645	Zm00008a005264	99.8	99.8	0	yes
	Zm00008a033407	40.79	89.23	9e-126	yes
GRMZM2G392076	Zm00008a030446	74.84	68.62	1e-71	no
	Zm00008a014198	84.26	60.42	5e-58	no
	Zm00008a024634	75.4	64.8	6e-49	yes
GRMZM2G049888	Zm00008a005508	68.56	80.22	0	yes
	Zm00008a030174	40.96	70.81	2e-111	yes
	Zm00008a006820	42.49	98.17	1e-102	yes
	Zm00008a009830	43.28	93.06	2e-101	yes
GRMZM2G018974	Zm00008a005865	99.85	96.11	0	yes
	Zm00008a010238	95.54	87.85	0	yes
	Zm00008a010246	94.94	87.85	0	yes
	Zm00008a040458	94.79	87.53	0	no
	Zm00008a040352	94.94	87.85	0	no
GRMZM5G884466	Zm00008a005897	88.45	99.76	0	yes
	Zm00008a032255	40.36	86.94	4e-125	yes
GRMZM2G005980	Zm00008a029805	99.52	99.84	0	yes
	Zm00008a011597	80.06	98.71	0	yes
GRMZM2G041231	Zm00008a029865	98.28	78.7	5e-150	no
	Zm00008a040355	56.59	88.14	4e-94	no
GRMZM2G349193	Zm00008a029875	99.73	72.87	0	yes
	Zm00008a006820	44.59	92.49	5e-108	yes
	Zm00008a017522	43.84	84.95	4e-107	yes
	Zm00008a030174	43.19	66.71	2e-106	yes
	Zm00008a013987	42.46	87.52	3e-103	yes
GRMZM2G175253	Zm00008a030174	98.15	85.73	0	yes
	Zm00008a038119	42.75	93.38	2e-159	yes
	Zm00008a009830	43.26	88.75	2e-150	yes
	Zm00008a019102	44.06	95.53	1e-143	yes
	Zm00008a025568	41.83	97.45	1e-143	yes
GRMZM2G114572	Zm00008a030390	100	88.99	0	yes
	Zm00008a038119	53.35	83.74	5e-156	yes
	Zm00008a030174	48.68	76.88	1e-151	yes
	Zm00008a009830	46.94	98.97	4e-139	yes
	Zm00008a022004	45.54	73.95	2e-138	yes
GRMZM2G431850	Zm00008a030898	100	99.87	0	yes
	Zm00008a030902	96.24	99.5	0	yes
	Zm00008a040458	47.02	97.19	0	no
	Zm00008a010246	46.89	97.55	0	yes
	Zm00008a010238	47.02	97.55	0	yes
GRMZM2G416201	Zm00008a030902	100	99.87	0	yes
	Zm00008a030898	96.24	99.75	0	yes
	Zm00008a010238	47.8	97.91	0	yes
	Zm00008a040458	47.15	97.56	0	no
	Zm00008a010246	47.02	97.91	0	yes
GRMZM2G017821	Zm00008a030906	98.25	60.69	0	no
	Zm00008a040023	40.77	75.92	3e-94	no
AC187551.3_FG002	Zm00008a031120	98.92	88.54	0	yes
	Zm00008a025632	91.94	82.1	0	yes
GRMZM2G098712	Zm00008a033702	98.55	79.88	0	yes
	Zm00008a031197	99.04	60.64	0	yes
GRMZM2G450537	Zm00008a031258	71.85	86.49	2e-138	yes
	Zm00008a025846	56.38	90.89	6e-92	yes
GRMZM2G320041	Zm00008a017429	89.4	86.12	0	yes
	Zm00008a032695	96.51	87.45	3e-50	no
	Zm00008a013010	89.53	98.68	4e-48	no
GRMZM2G020008	Zm00008a032180	100	89.39	0	yes
	Zm00008a028383	41.46	93.69	2e-126	yes
	Zm00008a035743	41.15	87.21	5e-121	yes
GRMZM5G838388	Zm00008a032437	98.75	96.66	0	yes
	Zm00008a012626	88.87	79.77	0	yes
GRMZM2G160791	Zm00008a006857	98.03	78.81	3e-145	no
	Zm00008a011442	95.57	78.25	5e-141	no
	Zm00008a021237	93.75	61.58	3e-48	no
GRMZM2G440348	Zm00008a039836	92.21	94.43	0	no
	Zm00008a017213	98.17	88.52	1e-112	no
GRMZM2G404043	Zm00008a033104	97.19	77.99	0	yes
	Zm00008a022063	47.06	97.31	0	yes
	Zm00008a004460	48.98	74.55	3e-169	yes
	Zm00008a019854	48.68	74.7	4e-167	yes
	Zm00008a021760	40.85	99.85	3e-141	yes
GRMZM2G341621	Zm00008a026711	96.19	91.77	0	no
	Zm00008a025234	44.99	86.34	9e-116	yes
	Zm00008a000098	41.76	82.31	8e-108	yes
GRMZM2G408379	Zm00008a030174	43.35	84.15	4e-142	yes
	Zm00008a009830	40.72	90.42	2e-139	yes
	Zm00008a020433	43.01	95.92	2e-137	yes
	Zm00008a038119	44.74	91.65	9e-136	yes
	Zm00008a028355	42.43	91.84	3e-134	yes
GRMZM2G406746	Zm00008a026925	97.4	78.69	0	yes
	Zm00008a011809	95.45	86.75	2e-160	yes
GRMZM2G361615	Zm00008a027103	65.08	76.67	0	yes
	Zm00008a011597	42.01	87.34	8e-127	yes
	Zm00008a029805	40.71	88.62	2e-125	yes
GRMZM2G441089	Zm00008a032688	95.93	99.63	0	yes
	Zm00008a015340	94.81	99.63	0	yes
	Zm00008a040438	95.35	97.41	2e-179	no
	Zm00008a030579	95.71	81.48	5e-95	no
GRMZM2G427826	Zm00008a008603	92.21	79.45	0	yes
	Zm00008a027269	100	63.7	0	yes
	Zm00008a023480	45.41	99.27	1e-164	yes
GRMZM2G399877	Zm00008a027296	94.21	71.52	0	yes
	Zm00008a030390	43.06	70.34	9e-92	yes
GRMZM2G335589	Zm00008a033892	97.14	69.17	9e-109	yes
	Zm00008a012170	95.43	69.17	5e-106	yes
GRMZM2G138012	Zm00008a027721	99.19	74.33	0	yes
	Zm00008a027746	41.12	74.17	9e-104	yes
GRMZM2G367355	Zm00008a027746	99.33	91.14	0	yes
	Zm00008a001326	44.24	97.57	0	yes
	Zm00008a020843	40.68	74.76	2e-160	yes
	Zm00008a012242	40.25	85.07	1e-159	yes
GRMZM5G851929	Zm00008a028355	99.66	99.83	0	yes
	Zm00008a009830	47.66	98.63	8e-143	yes
	Zm00008a030174	42.72	77.15	2e-132	yes
	Zm00008a022004	45.17	74.21	5e-129	yes
	Zm00008a010516	46.44	91.68	1e-128	yes
GRMZM2G111780	Zm00008a028383	100	99.84	0	yes
	Zm00008a038119	40.58	91.08	3e-162	yes
	Zm00008a003250	44.23	92.82	5e-152	yes
GRMZM2G127015	Zm00008a028512	97.55	92.32	0	yes
	Zm00008a007157	40.07	89.69	2e-49	yes
GRMZM2G396752	Zm00008a021738	84.91	84.73	3e-173	yes
	Zm00008a002248	79	66.95	3e-116	yes
	Zm00008a002401	90.51	82.92	5e-83	no
GRMZM2G083950	Zm00008a029043	100	99.85	0	yes
	Zm00008a020556	42.64	73.95	5e-95	yes
GRMZM2G057176	Zm00008a029237	97.82	79.3	0	yes
	Zm00008a006466	40.24	90.52	2e-154	yes
GRMZM2G017593	Zm00008a037808	95.06	75.67	1e-104	yes
	Zm00008a026588	80	82.05	2e-79	yes
	Zm00008a000771	76.43	97.4	7e-72	yes
GRMZM2G121579	Zm00008a012170	80.94	80.42	6e-172	yes
	Zm00008a033892	80.31	80.42	2e-170	yes
	Zm00008a029373	95.36	85.39	2e-123	yes
GRMZM2G326263	Zm00008a029554	98.39	72.14	0	yes
	Zm00008a038119	42.88	99.29	3e-128	yes
GRMZM2G137894	Zm00008a023443	94.94	87.24	0	yes
	Zm00008a038119	44.8	83.45	4e-133	yes
	Zm00008a033538	44.27	96.72	3e-132	yes
	Zm00008a008466	42	88.28	4e-129	yes
	Zm00008a013530	42.17	92.5	1e-127	yes
GRMZM2G073433	Zm00008a023480	99.85	98.53	0	yes
	Zm00008a008603	47.99	81.22	8e-148	yes
	Zm00008a027269	48.68	65.13	6e-120	yes
GRMZM2G130699	Zm00008a019102	40.22	81.61	2e-66	yes
	Zm00008a017522	42.04	84.78	2e-63	yes
GRMZM2G103078	Zm00008a017261	43.07	88.73	0	yes
	Zm00008a001684	43.32	87.88	2e-165	yes
GRMZM5G811022	Zm00008a038119	48.34	74.1	7e-172	yes
	Zm00008a009830	42.49	89.41	3e-148	yes
	Zm00008a024973	94.04	85.12	1e-146	yes
	Zm00008a033538	43.02	91.8	7e-145	yes
GRMZM2G129783	Zm00008a024888	99.18	84.58	0	yes
	Zm00008a038119	40.29	79.98	1e-163	yes
GRMZM2G425647	Zm00008a004986	92.31	66.34	3e-170	yes
	Zm00008a033896	96.17	71.3	2e-161	yes
	Zm00008a032458	78.41	95.7	2e-76	no
	Zm00008a012670	77.27	89.12	2e-74	no
	Zm00008a008728	71.71	80.09	2e-47	no
GRMZM2G071162	Zm00008a025234	100	99.8	0	yes
	Zm00008a000098	42.59	95.53	6e-124	yes
	Zm00008a026711	44.72	93.89	1e-115	no
AC204292.4_FG002	Zm00008a025568	98.8	99.85	0	yes
	Zm00008a027746	40.68	88.55	1e-150	yes
GRMZM2G068323	Zm00008a025632	100	82.49	0	yes
	Zm00008a031120	91.06	88.96	0	yes
GRMZM2G447535	Zm00008a025818	99.81	85.03	0	yes
	Zm00008a027746	40.93	80.96	7e-129	yes
	Zm00008a029237	41.02	95.6	1e-127	yes
GRMZM2G111984	Zm00008a025846	99.2	92.49	0	yes
	Zm00008a031258	83.83	72.71	5e-94	yes
AC218148.2_FG008	Zm00008a026215	98.28	69.82	0	yes
	Zm00008a014564	56.88	65.17	2e-100	yes
GRMZM2G310758	Zm00008a026279	97.43	99.74	0	yes
	Zm00008a016602	40.16	86.64	2e-152	yes
GRMZM2G455587	Zm00008a026509	100	96.75	0	yes
	Zm00008a001684	41.42	70.57	2e-144	yes
GRMZM2G073551	Zm00008a030906	94.15	60.9	0	no
	Zm00008a040023	40.1	75.65	4e-94	no
GRMZM2G465444	Zm00008a014809	86.25	92.99	0	yes
	Zm00008a010597	82.48	96.23	0	yes
	Zm00008a017811	75.56	91.96	0	yes
GRMZM2G001466	Zm00008a036513	99.83	99.83	0	yes
	Zm00008a036506	98.46	99.66	0	yes
GRMZM2G005938	Zm00008a037058	98.5	99.33	0	yes
	Zm00008a015464	58.17	74.67	5e-172	yes
GRMZM2G011928	Zm00008a006857	97.1	98.92	1e-146	no
	Zm00008a011442	94.69	99.64	9e-143	no
	Zm00008a021237	92.5	78.99	7e-48	no
GRMZM2G002863	Zm00008a037808	99.73	90.91	0	yes
	Zm00008a000771	75.08	81.07	4e-166	yes
	Zm00008a026588	70.48	98.57	3e-157	yes
GRMZM2G481373	Zm00008a038119	98.65	99.86	0	yes
	Zm00008a030174	43.7	91.68	8e-166	yes
	Zm00008a009830	43.77	83	1e-157	yes
	Zm00008a001684	42.31	87.75	7e-151	yes
GRMZM2G164563	Zm00008a000311	92.2	79.2	0	yes
	Zm00008a038813	96.25	76.75	0	yes
a, Yes means this gene is a PPR gene in PH207 genome and No means this gene is not a PPR gene in PH207 genome
